# Supplementary material
Source: Springer Nature journal article supplement (https://www.springermedizin.de/resource/supplementary/12990_2008_203_MOESM7_ESM.pdf/9612780)

a.

Paw withdrawal threshold (g)

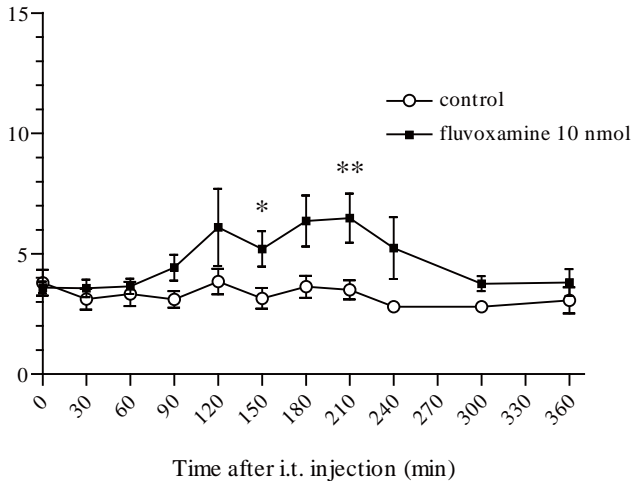

b.

Paw withdrawal threshold (g)

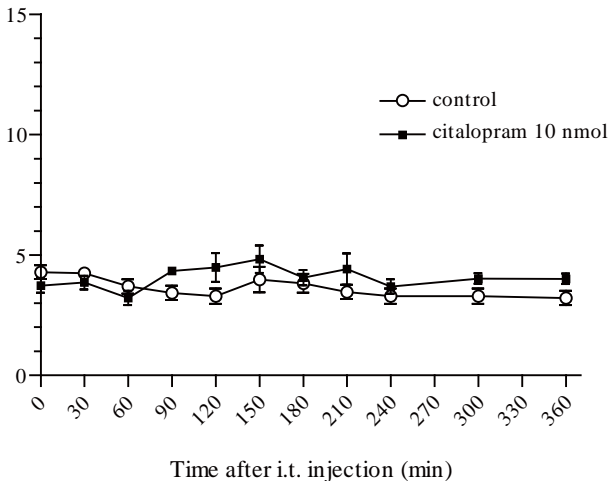

Supplement: MOESM7 [file 9612780]
